# Supplementary material for: Clinical outcomes of daily 5-fraction Gamma Knife radiosurgery for large brain metastases: a retrospective cohort study
Source: Research Square preprint supplement (doi:10.21203/rs.3.rs-8667314/v1), 2026-01-29
Supplement: Supplementary file 1 [file 15c55a17efaf44619c3cff57.docx]

**Tables**

**TABLE 1.** Baseline clinical and radiological characteristics of the study cohorts (n = 100)

| Characteristic | Quantity |
| --- | --- |
| Sex  Male  Female | 46 (46%)  54 (54%) |
| Median age at GKRS, years | 60 (32─91) |
| Median pre-GKRS KPS  60─70  80─100 | 70 (60─100)  53 (53%)  47 (47%) |
| Pre-GKRS neurological deficits | 47 (47%) |
| Primary cancer origin  Lung (NSCLC)  Lung (SCLC)  Breast  Genitourinary  Gastrointestinal  Other*  Metastasis of unknown primary | 41 (41%)  4 (4%)  24 (24%)  16 (16%)  7 (7%)  5 (5%)  3 (3%) |
| Extracranial metastases | 43 (43%) |
| Prior WBRT | 4 (4%) |
| Prior GKRS for other brain metastases | 9 (9%) |
| Number of brain metastases  1  2─5  >5 | 33 (33%)  48 (48%)  19 (19%) |
| Location of large brain metastases  Frontal lobe  Parietal lobe  Temporal lobe  Occipital lobe  Cerebellum  Basal ganglia, thalamus, or insula  Intraventricular | 27 (27%)  20 (20%)  13 (13%)  16 (16%)  18 (18%)  3 (3%)  3 (3%) |
| Median follow-up, months | 18 (3─72) |

Abbreviations: GKRS = Gamma Knife radiosurgery; KPS = Karnofsky Performance Status; NSCLC = non-small cell lung cancer; SCLC = small cell lung cancer; WBRT = whole-brain radiotherapy

* Other included thyroid (n = 2), skin (n = 1), neuroendocrine (n = 1), and salivary gland (n = 1).

**TABLE 2.** Radiosurgical and survival outcomes in the study cohort (n = 100)

| Characteristic | Quantity |
| --- | --- |
| Median tumor volume, cm3 | 22.0 (14.1─69.5) |
| Median marginal dose, Gy | 35.2 (24.9─41.5) |
| Local control rate at final follow-up | 74 (74%) |
| Best response time after GKRS  Median interval from GKRS, months  <12 months | 4 (1─36)  86 (86%) |
| Maximum volume reduction after GKRS  Median volume decrease, %  Volume decrease >95% | 80 (22─100)  30 (30%) |
| Cumulative local control  Mean, months  1-year rate, %  2-year rate, %  3-year rate, % | 47.8 (40.2─55.5)*  72.7 (62.3─83.1) *  65.3 (53.5─77.1) *  59.9 (44.9─74.9) * |
| Progression-free survival  Median, months  1-year rate, %  2-year rate, %  3-year rate, % | 7.5 (4.6─10.4) *  37.2 (26.6─47.8) *  17.9 (8.7─27.1) *  14.0 (5.4─22.6) * |
| Overall survival  Median, months  1-year rate, %  2-year rate, %  3-year rate, % | 16.3 (11.1─21.5) *  56.9 (46.9─66.9) *  37.6 (27.6─47.6) *  25.7 (16.1─35.3) * |

Abbreviations: Gy = gray; GKRS = Gamma Knife radiosurgery

*95% confidence interval

**TABLE 3.** Comparison of present study outcomes with selected studies of hypofractionated GKRS for large brain metastases

| **Author, year** | **Tumors, n** | **Volume, cm3** | **Fractions, n** | **Dose, Gy** | **Follow-up, mo** | **12-mo LTC, %** | **12-mo OS, %** | **RN, %** |
| --- | --- | --- | --- | --- | --- | --- | --- | --- |
| Kim et al., 201635 | 36 | 18.3 [10.0─50.3] | 3 [2─4] | 24 [20─30] | 43.2 | 90.0 | 66.7 | 2.7 |
| Park et al., 201936 | 17 | 21.2 [11.0─38.1] | 3 [3─5] | 27 [21─40] | 51.3 | 100.0 | 93.3 | 0 |
| Samanci et al., 202137 | 76 | 6 [4.0─22.2] | 3 [3─5] | 27 [21─30] | 51.3 | 96.0 | 63.6 | 0 |
| Noda et al., 202334 | 78 | 7 [4.0─55.8] | 10 [3─15] | 35 [27─45] | 51.6 | 72.0 | 76.7 | 6.4 |
| Mishra et al., 20235 | 90 | 16.0 (10.1─42.3) | 3 [3─5] | 27 [24─27] | NA | 79.2  (<3cm: 95.0%  3-4cm: 82.7%  4 cm: 62.5%) | NA | 6.5 |
| Present study, 2025 | 100 | 22.0 [14.1─69.5] | 5 | 35.2 [24.9─41.5] | 18.0 | 74.0 | 56.9 | 9.0 |

Abbreviations: GKRS = Gamma Knife radiosurgery; n = number; Gy = gray; mo = months; LTC = local tumor control; OS = overall survival; RN = radiation necrosis; NA = not available
